# Supplementary material for: Electrochemical proton reduction catalysed by selenolato-manganese carbonyl complexes
Source: Royal Society of Chemistry journal article supplement (doi:10.1039/c5ra04432d), 2015-01-01
Supplement: c5ra04432d1.pdf [file c5ra04432d1.pdf]

## Electrochemical Proton Reduction Catalysed by Selenolato-Manganese Carbonyl Complexes

Kaipeng Hou,<sup>a</sup> Sherman J. L. Lauw,<sup>b</sup> Richard D. Webster<sup>b</sup> and Wai Yip Fan <sup>\*a</sup>

<sup>a</sup>Department of Chemistry, National University of Singapore, 3 Science Drive 3, Singapore 117543.

<sup>b</sup>Division of Chemistry & Biological Chemistry, Nanyang Technological University SPMS-04-01, 21 Nanyang Avenue, SPMS-CBC-06-07, Singapore 637371

### Infrared spectrum resulting from the reaction of 1 with Na in thf

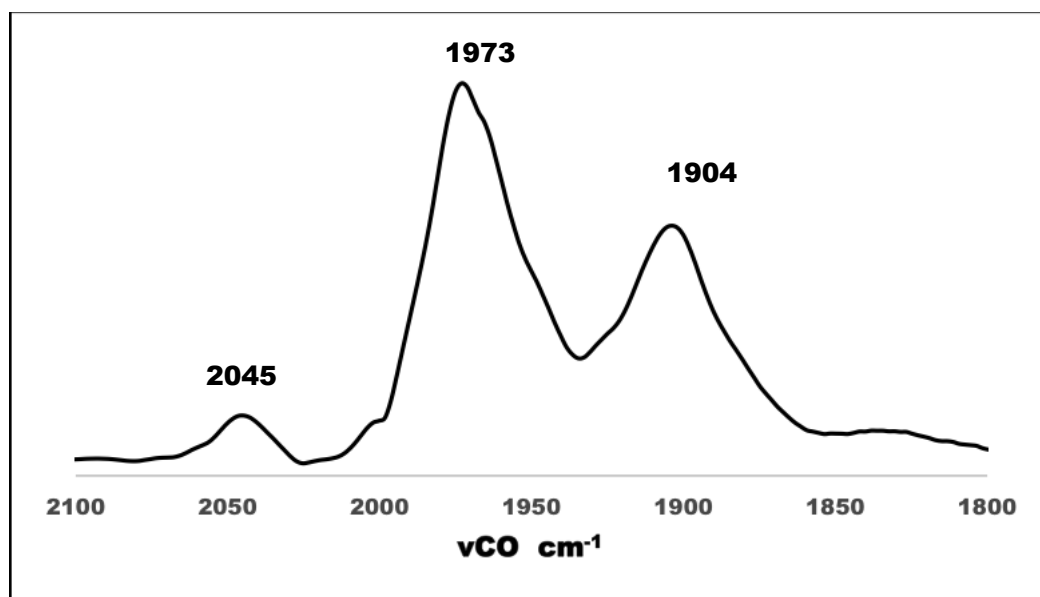

$\nu_{\text{CO}}$  peaks of Complex 1 in THF after Na is added.

**General Single crystal X-ray structural study details.** Crystals were grown from solvents in dichloromethane/hexane . The X-ray data were collected with a Bruker AXS D8 Venture Kappa four cycles X-ray diffractometer system equipped with a Photon 100 detector, using a Mo sealed microfocusing Source, with the Bruker Apex 2 suite program<sup>1</sup> .

Data were integrated with the Bruker SAINT program<sup>2</sup> using a narrow-frame algorithm. Sadabs ( Sheldrick G.M. 2012)<sup>3</sup> was used for absorption correction. Structural solution and refinement were carried out with the SHELXTL<sup>4</sup> suite of programs. The structures were solved by direct methods, followed by difference maps and refined with full-matrix least-squares on F<sup>2</sup>. All non-hydrogen atoms were generally given anisotropic displacement parameters in the final model. All hydrogen atoms were put at calculated positions. The thermal ellipsoid plots were created using the XP component of SHELXTL.

For complex 2, two terminal C atoms of one of the n-butyl groups were disordered into two positions with occupancy ratio=84:16. Restraints in bond lengths and thermal parameters were applied to the disordered atoms. The minor parts were kept isotropic. The high residue peaks could be due to the crystal was a thin plate.

For complex 4, a twin refinement was performed and found the twin component refinement has a BASF value of 0.01265.

Reference:

1. Apex2 v2013,9.0 , Bruker AXS Inc.
2. SAINT V8.32B, 2013, Bruker AXS Inc.
3. G.M . Sheldrick, Sadabs, v2012/1, Bruker AXS Inc.
4. G.M . Sheldrick, SHELXTL, Bruker AXS Inc

## 1. Crystal structure information of complex 2.

### (1) Data collection and structure refinement for complex 2.

|                                        |                                    |
|----------------------------------------|------------------------------------|
| <b>Theta range for data collection</b> | 2.08 to 27.50°                     |
| <b>Index ranges</b>                    | -14<=h<=14, -26<=k<=26, -26<=l<=26 |
| <b>Reflections collected</b>           | 75699                              |
| <b>Independent reflections</b>         | 10274 [R(int) = 0.0857]            |
| <b>Max. and min. transmission</b>      | 0.5633 and 0.4485                  |
| <b>Structure solution technique</b>    | direct methods                     |

|                                          |                                                                                                                         |                           |
|------------------------------------------|-------------------------------------------------------------------------------------------------------------------------|---------------------------|
| <b>Structure solution program</b>        | SHELXS-97 (Sheldrick 2008)                                                                                              |                           |
| <b>Refinement method</b>                 | Full-matrix least-squares on F <sup>2</sup>                                                                             |                           |
| <b>Refinement program</b>                | SHELXL-2013 (Sheldrick, 2013)                                                                                           |                           |
| <b>Function minimized</b>                | $\Sigma w(F_o^2 - F_c^2)^2$                                                                                             |                           |
| <b>Data / restraints / parameters</b>    | 10274 / 6 / 484                                                                                                         |                           |
| <b>Goodness-of-fit on F<sup>2</sup></b>  | 1.007                                                                                                                   |                           |
| <b><math>\Delta/\sigma_{\max}</math></b> | 0.002                                                                                                                   |                           |
| <b>Final R indices</b>                   | 7501 data; I>2 $\sigma$ (I)                                                                                             | R1 = 0.0387, wR2 = 0.0731 |
|                                          | all data                                                                                                                | R1 = 0.0706, wR2 = 0.0805 |
| <b>Weighting scheme</b>                  | w=1/[ $\sigma^2(F_o^2)+(0.0340P)^2+3.3988P$ ]<br>where P=(F <sub>o</sub> <sup>2</sup> +2F <sub>c</sub> <sup>2</sup> )/3 |                           |
| <b>Largest diff. peak and hole</b>       | 1.228 and -0.446 eÅ <sup>-3</sup>                                                                                       |                           |
| <b>R.M.S. deviation from mean</b>        | 0.098 eÅ <sup>-3</sup>                                                                                                  |                           |

**(2) Bond lengths (Å) for complex 2.**

|         |           |         |           |
|---------|-----------|---------|-----------|
| Mn1-C14 | 1.790(3)  | Mn1-C15 | 1.795(3)  |
| Mn1-C13 | 2.032(3)  | Mn1-P1  | 2.3021(8) |
| Mn1-Se2 | 2.4601(5) | Mn1-Se1 | 2.4672(5) |
| Mn1-Mn2 | 2.6528(6) | Mn2-C16 | 1.786(3)  |
| Mn2-C17 | 1.794(3)  | Mn2-C13 | 2.017(3)  |
| Mn2-P2  | 2.3014(9) | Mn2-Se1 | 2.4640(5) |
| Mn2-Se2 | 2.4647(5) | Se1-C1  | 1.932(3)  |
| Se2-C7  | 1.935(3)  | P1-C22  | 1.833(3)  |
| P1-C26  | 1.835(3)  | P1-C18  | 1.836(3)  |
| P2-C30  | 1.836(3)  | P2-C38  | 1.840(3)  |
| P2-C34  | 1.841(3)  | O1-C13  | 1.170(3)  |
| O2-C14  | 1.152(3)  | O3-C15  | 1.156(3)  |
| O4-C16  | 1.161(3)  | O5-C17  | 1.157(3)  |
| C1-C6   | 1.384(4)  | C1-C2   | 1.392(4)  |
| C2-C3   | 1.385(4)  | C2-H2   | 0.95      |

|          |          |          |          |
|----------|----------|----------|----------|
| C3-C4    | 1.382(4) | C3-H3    | 0.95     |
| C4-C5    | 1.389(4) | C4-H4    | 0.95     |
| C5-C6    | 1.386(4) | C5-H5    | 0.95     |
| C6-H6    | 0.95     | C7-C12   | 1.381(4) |
| C7-C8    | 1.397(4) | C8-C9    | 1.383(4) |
| C8-H8    | 0.95     | C9-C10   | 1.374(5) |
| C9-H9    | 0.95     | C10-C11  | 1.380(4) |
| C10-H10  | 0.95     | C11-C12  | 1.400(4) |
| C11-H11  | 0.95     | C12-H12  | 0.95     |
| C18-C19  | 1.532(4) | C18-H18A | 0.99     |
| C18-H18B | 0.99     | C19-C20  | 1.524(4) |
| C19-H19A | 0.99     | C19-H19B | 0.99     |
| C20-C21  | 1.521(4) | C20-H20A | 0.99     |
| C20-H20B | 0.99     | C21-H21A | 0.98     |
| C21-H21B | 0.98     | C21-H21C | 0.98     |
| C22-C23  | 1.534(4) | C22-H22A | 0.99     |
| C22-H22B | 0.99     | C23-C24  | 1.534(4) |
| C23-H23A | 0.99     | C23-H23B | 0.99     |
| C24-C25  | 1.507(5) | C24-H24A | 0.99     |
| C24-H24B | 0.99     | C25-H25A | 0.98     |
| C25-H25B | 0.98     | C25-H25C | 0.98     |
| C26-C27  | 1.537(4) | C26-H26A | 0.99     |
| C26-H26B | 0.99     | C27-C28  | 1.519(4) |
| C27-H27A | 0.99     | C27-H27B | 0.99     |
| C28-C29  | 1.520(4) | C28-H28A | 0.99     |
| C28-H28B | 0.99     | C29-H29A | 0.98     |
| C29-H29B | 0.98     | C29-H29C | 0.98     |
| C30-C31  | 1.530(4) | C30-H30A | 0.99     |
| C30-H30B | 0.99     | C31-C32  | 1.528(4) |
| C31-H31A | 0.99     | C31-H31B | 0.99     |
| C32-C33  | 1.516(4) | C32-H32A | 0.99     |
| C32-H32B | 0.99     | C33-H33A | 0.98     |
| C33-H33B | 0.98     | C33-H33C | 0.98     |
| C34-C35  | 1.538(4) | C34-H34A | 0.99     |
| C34-H34B | 0.99     | C35-C36  | 1.528(4) |
| C35-H35A | 0.99     | C35-H35B | 0.99     |
| C36-C37  | 1.520(4) | C36-H36A | 0.99     |
| C36-H36B | 0.99     | C37-H37A | 0.98     |
| C37-H37B | 0.98     | C37-H37C | 0.98     |
| C38-C39  | 1.543(4) | C38-H38A | 0.99     |

|           |          |           |           |
|-----------|----------|-----------|-----------|
| C38-H38B  | 0.99     | C39-C40A  | 1.515(15) |
| C39-C40   | 1.538(5) | C40-C41   | 1.510(6)  |
| C40-H40A  | 0.99     | C40-H40B  | 0.99      |
| C41-H41A  | 0.98     | C41-H41B  | 0.98      |
| C41-H41C  | 0.98     | C40A-C41A | 1.509(16) |
| C40A-H40C | 0.99     | C40A-H40D | 0.99      |
| C41A-H41D | 0.98     | C41A-H41E | 0.98      |
| C41A-H41F | 0.98     |           |           |

**(3) Bond angles (°) for complex 2.**

|             |            |             |            |
|-------------|------------|-------------|------------|
| C14-Mn1-C15 | 90.53(13)  | C14-Mn1-C13 | 84.71(11)  |
| C15-Mn1-C13 | 82.14(12)  | C14-Mn1-P1  | 86.21(9)   |
| C15-Mn1-P1  | 88.18(9)   | C13-Mn1-P1  | 166.64(9)  |
| C14-Mn1-Se2 | 171.69(9)  | C15-Mn1-Se2 | 97.67(9)   |
| C13-Mn1-Se2 | 95.08(8)   | P1-Mn1-Se2  | 95.32(2)   |
| C14-Mn1-Se1 | 96.80(9)   | C15-Mn1-Se1 | 171.73(10) |
| C13-Mn1-Se1 | 94.68(8)   | P1-Mn1-Se1  | 96.11(2)   |
| Se2-Mn1-Se1 | 74.931(15) | C14-Mn1-Mn2 | 117.54(9)  |
| C15-Mn1-Mn2 | 115.62(9)  | C13-Mn1-Mn2 | 48.84(8)   |
| P1-Mn1-Mn2  | 144.52(3)  | Se2-Mn1-Mn2 | 57.492(14) |
| Se1-Mn1-Mn2 | 57.397(14) | C16-Mn2-C17 | 91.12(12)  |
| C16-Mn2-C13 | 84.80(12)  | C17-Mn2-C13 | 81.10(12)  |
| C16-Mn2-P2  | 87.84(9)   | C17-Mn2-P2  | 87.47(9)   |
| C13-Mn2-P2  | 166.25(8)  | C16-Mn2-Se1 | 169.83(9)  |
| C17-Mn2-Se1 | 98.93(9)   | C13-Mn2-Se1 | 95.14(8)   |
| P2-Mn2-Se1  | 94.14(2)   | C16-Mn2-Se2 | 94.96(9)   |
| C17-Mn2-Se2 | 172.64(9)  | C13-Mn2-Se2 | 95.31(8)   |
| P2-Mn2-Se2  | 96.88(2)   | Se1-Mn2-Se2 | 74.906(15) |
| C16-Mn2-Mn1 | 116.41(9)  | C17-Mn2-Mn1 | 116.08(9)  |
| C13-Mn2-Mn1 | 49.30(8)   | P2-Mn2-Mn1  | 144.19(3)  |
| Se1-Mn2-Mn1 | 57.513(14) | Se2-Mn2-Mn1 | 57.324(14) |
| C1-Se1-Mn2  | 112.42(8)  | C1-Se1-Mn1  | 113.29(8)  |
| Mn2-Se1-Mn1 | 65.090(15) | C7-Se2-Mn1  | 112.86(9)  |
| C7-Se2-Mn2  | 113.67(8)  | Mn1-Se2-Mn2 | 65.185(15) |
| C22-P1-C26  | 102.74(14) | C22-P1-C18  | 103.06(14) |
| C26-P1-C18  | 103.38(13) | C22-P1-Mn1  | 112.61(10) |
| C26-P1-Mn1  | 117.02(10) | C18-P1-Mn1  | 116.22(10) |
| C30-P2-C38  | 101.31(13) | C30-P2-C34  | 103.01(13) |
| C38-P2-C34  | 103.24(14) | C30-P2-Mn2  | 116.61(10) |

|               |            |               |            |
|---------------|------------|---------------|------------|
| C38-P2-Mn2    | 117.42(10) | C34-P2-Mn2    | 113.25(10) |
| C6-C1-C2      | 119.6(3)   | C6-C1-Se1     | 124.5(2)   |
| C2-C1-Se1     | 115.9(2)   | C3-C2-C1      | 120.2(3)   |
| C3-C2-H2      | 119.9      | C1-C2-H2      | 119.9      |
| C4-C3-C2      | 120.1(3)   | C4-C3-H3      | 120.0      |
| C2-C3-H3      | 120.0      | C3-C4-C5      | 119.8(3)   |
| C3-C4-H4      | 120.1      | C5-C4-H4      | 120.1      |
| C6-C5-C4      | 120.2(3)   | C6-C5-H5      | 119.9      |
| C4-C5-H5      | 119.9      | C1-C6-C5      | 120.0(3)   |
| C1-C6-H6      | 120.0      | C5-C6-H6      | 120.0      |
| C12-C7-C8     | 119.4(3)   | C12-C7-Se2    | 125.7(2)   |
| C8-C7-Se2     | 114.9(2)   | C9-C8-C7      | 120.6(3)   |
| C9-C8-H8      | 119.7      | C7-C8-H8      | 119.7      |
| C10-C9-C8     | 120.1(3)   | C10-C9-H9     | 119.9      |
| C8-C9-H9      | 119.9      | C9-C10-C11    | 119.9(3)   |
| C9-C10-H10    | 120.1      | C11-C10-H10   | 120.1      |
| C10-C11-C12   | 120.6(3)   | C10-C11-H11   | 119.7      |
| C12-C11-H11   | 119.7      | C7-C12-C11    | 119.5(3)   |
| C7-C12-H12    | 120.3      | C11-C12-H12   | 120.3      |
| O1-C13-Mn2    | 139.3(2)   | O1-C13-Mn1    | 138.8(2)   |
| Mn2-C13-Mn1   | 81.86(11)  | O2-C14-Mn1    | 175.7(2)   |
| O3-C15-Mn1    | 175.3(3)   | O4-C16-Mn2    | 177.1(2)   |
| O5-C17-Mn2    | 175.1(2)   | C19-C18-P1    | 112.75(19) |
| C19-C18-H18A  | 109.0      | P1-C18-H18A   | 109.0      |
| C19-C18-H18B  | 109.0      | P1-C18-H18B   | 109.0      |
| H18A-C18-H18B | 107.8      | C20-C19-C18   | 114.3(2)   |
| C20-C19-H19A  | 108.7      | C18-C19-H19A  | 108.7      |
| C20-C19-H19B  | 108.7      | C18-C19-H19B  | 108.7      |
| H19A-C19-H19B | 107.6      | C21-C20-C19   | 111.0(2)   |
| C21-C20-H20A  | 109.4      | C19-C20-H20A  | 109.4      |
| C21-C20-H20B  | 109.4      | C19-C20-H20B  | 109.4      |
| H20A-C20-H20B | 108.0      | C20-C21-H21A  | 109.5      |
| C20-C21-H21B  | 109.5      | H21A-C21-H21B | 109.5      |
| C20-C21-H21C  | 109.5      | H21A-C21-H21C | 109.5      |
| H21B-C21-H21C | 109.5      | C23-C22-P1    | 117.3(2)   |
| C23-C22-H22A  | 108.0      | P1-C22-H22A   | 108.0      |
| C23-C22-H22B  | 108.0      | P1-C22-H22B   | 108.0      |
| H22A-C22-H22B | 107.2      | C24-C23-C22   | 112.5(3)   |
| C24-C23-H23A  | 109.1      | C22-C23-H23A  | 109.1      |
| C24-C23-H23B  | 109.1      | C22-C23-H23B  | 109.1      |

|               |       |               |          |
|---------------|-------|---------------|----------|
| H23A-C23-H23B | 107.8 | C25-C24-C23   | 113.5(3) |
| C25-C24-H24A  | 108.9 | C23-C24-H24A  | 108.9    |
| C25-C24-H24B  | 108.9 | C23-C24-H24B  | 108.9    |
| H24A-C24-H24B | 107.7 | C24-C25-H25A  | 109.5    |
| C24-C25-H25B  | 109.5 | H25A-C25-H25B | 109.5    |
| C24-C25-H25C  | 109.5 | H25A-C25-H25C | 109.5    |
| H25B-C25-H25C | 109.5 | C27-C26-P1    | 113.7(2) |
| C27-C26-H26A  | 108.8 | P1-C26-H26A   | 108.8    |
| C27-C26-H26B  | 108.8 | P1-C26-H26B   | 108.8    |
| H26A-C26-H26B | 107.7 | C28-C27-C26   | 113.1(3) |
| C28-C27-H27A  | 109.0 | C26-C27-H27A  | 109.0    |
| C28-C27-H27B  | 109.0 | C26-C27-H27B  | 109.0    |
| H27A-C27-H27B | 107.8 | C27-C28-C29   | 112.6(3) |
| C27-C28-H28A  | 109.1 | C29-C28-H28A  | 109.1    |
| C27-C28-H28B  | 109.1 | C29-C28-H28B  | 109.1    |
| H28A-C28-H28B | 107.8 | C28-C29-H29A  | 109.5    |
| C28-C29-H29B  | 109.5 | H29A-C29-H29B | 109.5    |
| C28-C29-H29C  | 109.5 | H29A-C29-H29C | 109.5    |
| H29B-C29-H29C | 109.5 | C31-C30-P2    | 114.6(2) |
| C31-C30-H30A  | 108.6 | P2-C30-H30A   | 108.6    |
| C31-C30-H30B  | 108.6 | P2-C30-H30B   | 108.6    |
| H30A-C30-H30B | 107.6 | C32-C31-C30   | 111.9(2) |
| C32-C31-H31A  | 109.2 | C30-C31-H31A  | 109.2    |
| C32-C31-H31B  | 109.2 | C30-C31-H31B  | 109.2    |
| H31A-C31-H31B | 107.9 | C33-C32-C31   | 112.2(3) |
| C33-C32-H32A  | 109.2 | C31-C32-H32A  | 109.2    |
| C33-C32-H32B  | 109.2 | C31-C32-H32B  | 109.2    |
| H32A-C32-H32B | 107.9 | C32-C33-H33A  | 109.5    |
| C32-C33-H33B  | 109.5 | H33A-C33-H33B | 109.5    |
| C32-C33-H33C  | 109.5 | H33A-C33-H33C | 109.5    |
| H33B-C33-H33C | 109.5 | C35-C34-P2    | 116.2(2) |
| C35-C34-H34A  | 108.2 | P2-C34-H34A   | 108.2    |
| C35-C34-H34B  | 108.2 | P2-C34-H34B   | 108.2    |
| H34A-C34-H34B | 107.4 | C36-C35-C34   | 111.9(2) |
| C36-C35-H35A  | 109.2 | C34-C35-H35A  | 109.2    |
| C36-C35-H35B  | 109.2 | C34-C35-H35B  | 109.2    |
| H35A-C35-H35B | 107.9 | C37-C36-C35   | 111.8(3) |
| C37-C36-H36A  | 109.3 | C35-C36-H36A  | 109.3    |
| C37-C36-H36B  | 109.3 | C35-C36-H36B  | 109.3    |
| H36A-C36-H36B | 107.9 | C36-C37-H37A  | 109.5    |

|                |          |                |           |
|----------------|----------|----------------|-----------|
| C36-C37-H37B   | 109.5    | H37A-C37-H37B  | 109.5     |
| C36-C37-H37C   | 109.5    | H37A-C37-H37C  | 109.5     |
| H37B-C37-H37C  | 109.5    | C39-C38-P2     | 114.6(2)  |
| C39-C38-H38A   | 108.6    | P2-C38-H38A    | 108.6     |
| C39-C38-H38B   | 108.6    | P2-C38-H38B    | 108.6     |
| H38A-C38-H38B  | 107.6    | C40A-C39-C38   | 112.2(11) |
| C40-C39-C38    | 112.3(3) | C41-C40-C39    | 114.1(3)  |
| C41-C40-H40A   | 108.7    | C39-C40-H40A   | 108.7     |
| C41-C40-H40B   | 108.7    | C39-C40-H40B   | 108.7     |
| H40A-C40-H40B  | 107.6    | C40-C41-H41A   | 109.5     |
| C40-C41-H41B   | 109.5    | H41A-C41-H41B  | 109.5     |
| C40-C41-H41C   | 109.5    | H41A-C41-H41C  | 109.5     |
| H41B-C41-H41C  | 109.5    | C41A-C40A-C39  | 111.1(19) |
| C41A-C40A-H40C | 109.4    | C39-C40A-H40C  | 109.4     |
| C41A-C40A-H40D | 109.4    | C39-C40A-H40D  | 109.4     |
| H40C-C40A-H40D | 108.0    | C40A-C41A-H41D | 109.5     |
| C40A-C41A-H41E | 109.5    | H41D-C41A-H41E | 109.5     |
| C40A-C41A-H41F | 109.5    | H41D-C41A-H41F | 109.5     |
| H41E-C41A-H41F | 109.5    |                |           |

## 2. Crystal structure information of complex 3.

### (1) Data collection and structure refinement for complex 3.

|                                         |                                             |
|-----------------------------------------|---------------------------------------------|
| <b>Theta range for data collection</b>  | 2.37 to 27.50°                              |
| <b>Index ranges</b>                     | -21<=h<=21, -16<=k<=15, -14<=l<=14          |
| <b>Reflections collected</b>            | 16556                                       |
| <b>Independent reflections</b>          | 2955 [R(int) = 0.0526]                      |
| <b>Max. and min. transmission</b>       | 0.7700 and 0.6900                           |
| <b>Structure solution technique</b>     | direct methods                              |
| <b>Structure solution program</b>       | SHELXS-97 (Sheldrick 2008)                  |
| <b>Refinement method</b>                | Full-matrix least-squares on F <sup>2</sup> |
| <b>Refinement program</b>               | SHELXL-2013 (Sheldrick, 2013)               |
| <b>Function minimized</b>               | $\Sigma w(F_o^2 - F_c^2)^2$                 |
| <b>Data / restraints / parameters</b>   | 2955 / 0 / 178                              |
| <b>Goodness-of-fit on F<sup>2</sup></b> | 1.057                                       |



|                                    |                                                                                     |                           |
|------------------------------------|-------------------------------------------------------------------------------------|---------------------------|
| $\Delta/\sigma_{\max}$             | 0.001                                                                               |                           |
| <b>Final R indices</b>             | 2346 data; $I > 2\sigma(I)$                                                         | R1 = 0.0288, wR2 = 0.0510 |
|                                    | all data                                                                            | R1 = 0.0474, wR2 = 0.0560 |
| <b>Weighting scheme</b>            | $w = 1/[\sigma^2(F_o^2) + (0.0231P)^2 + 0.7096P]$<br>where $P = (F_o^2 + 2F_c^2)/3$ |                           |
| <b>Largest diff. peak and hole</b> | 0.569 and -0.438 eÅ <sup>-3</sup>                                                   |                           |
| <b>R.M.S. deviation from mean</b>  | 0.106 eÅ <sup>-3</sup>                                                              |                           |

**(2) Bond lengths (Å) for complex 3.**

|         |           |         |           |
|---------|-----------|---------|-----------|
| Se1-C1  | 1.936(2)  | Se1-Mn2 | 2.5104(4) |
| Se1-Mn1 | 2.5301(4) | Mn1-C7  | 1.793(3)  |
| Mn1-C7  | 1.794(3)  | Mn1-C8  | 1.804(4)  |
| Mn1-N1  | 2.103(3)  | Mn1-Se1 | 2.5301(4) |
| Mn2-C10 | 1.804(3)  | Mn2-C10 | 1.804(3)  |
| Mn2-C9  | 1.865(4)  | Mn2-C11 | 1.864(4)  |
| Mn2-Se1 | 2.5104(4) | O1-C7   | 1.158(3)  |
| O2-C8   | 1.146(4)  | O3-C9   | 1.140(4)  |
| O4-C10  | 1.150(3)  | O5-C11  | 1.137(4)  |
| N1-C12  | 1.346(3)  | N1-C12  | 1.346(3)  |
| C1-C2   | 1.386(3)  | C1-C6   | 1.388(3)  |
| C2-C3   | 1.383(3)  | C3-C4   | 1.377(4)  |
| C4-C5   | 1.384(4)  | C5-C6   | 1.389(4)  |
| C12-C13 | 1.378(4)  | C13-C14 | 1.383(3)  |
| C14-C13 | 1.383(3)  |         |           |

**(3) Bond angles (°) for complex 3.**

|             |            |             |            |
|-------------|------------|-------------|------------|
| C1-Se1-Mn2  | 109.97(7)  | C1-Se1-Mn1  | 108.44(7)  |
| Mn2-Se1-Mn1 | 95.730(13) | C7-Mn1-C7   | 86.71(15)  |
| C7-Mn1-C8   | 90.76(11)  | C7-Mn1-C8   | 90.76(11)  |
| C7-Mn1-N1   | 91.82(10)  | C7-Mn1-N1   | 91.83(10)  |
| C8-Mn1-N1   | 176.44(14) | C7-Mn1-Se1  | 94.97(7)   |
| C7-Mn1-Se1  | 178.16(8)  | C8-Mn1-Se1  | 89.96(8)   |
| N1-Mn1-Se1  | 87.38(6)   | C7-Mn1-Se1  | 178.16(8)  |
| C7-Mn1-Se1  | 94.97(7)   | C8-Mn1-Se1  | 89.96(8)   |
| N1-Mn1-Se1  | 87.38(6)   | Se1-Mn1-Se1 | 83.329(18) |
| C10-Mn2-C10 | 87.81(15)  | C10-Mn2-C9  | 92.75(11)  |
| C10-Mn2-C9  | 92.75(11)  | C10-Mn2-C11 | 94.86(11)  |
| C10-Mn2-C11 | 94.86(11)  | C9-Mn2-C11  | 169.43(15) |

|             |            |             |            |
|-------------|------------|-------------|------------|
| C10-Mn2-Se1 | 176.03(8)  | C10-Mn2-Se1 | 93.92(7)   |
| C9-Mn2-Se1  | 83.61(8)   | C11-Mn2-Se1 | 88.55(8)   |
| C10-Mn2-Se1 | 93.92(7)   | C10-Mn2-Se1 | 176.03(8)  |
| C9-Mn2-Se1  | 83.61(8)   | C11-Mn2-Se1 | 88.55(8)   |
| Se1-Mn2-Se1 | 84.132(19) | C12-N1-C12  | 116.7(3)   |
| C12-N1-Mn1  | 121.38(15) | C12-N1-Mn1  | 121.38(15) |
| C2-C1-C6    | 119.2(2)   | C2-C1-Se1   | 122.07(18) |
| C6-C1-Se1   | 118.70(19) | C3-C2-C1    | 120.3(2)   |
| C4-C3-C2    | 120.7(3)   | C3-C4-C5    | 119.3(3)   |
| C4-C5-C6    | 120.4(3)   | C1-C6-C5    | 120.1(3)   |
| O1-C7-Mn1   | 175.5(2)   | O2-C8-Mn1   | 179.4(3)   |
| O3-C9-Mn2   | 176.2(3)   | O4-C10-Mn2  | 176.2(2)   |
| O5-C11-Mn2  | 178.8(3)   | N1-C12-C13  | 123.2(2)   |
| C12-C13-C14 | 119.6(3)   | C13-C14-C13 | 117.7(4)   |

### 3. Crystal structure information of complex 4.

#### (1) Data collection and structure refinement for complex 4.

|                                          |                                                                                                     |                           |
|------------------------------------------|-----------------------------------------------------------------------------------------------------|---------------------------|
| <b>Theta range for data collection</b>   | 1.74 to 27.50°                                                                                      |                           |
| <b>Index ranges</b>                      | -22<=h<=22, -10<=k<=21, -15<=l<=15                                                                  |                           |
| <b>Reflections collected</b>             | 10940                                                                                               |                           |
| <b>Independent reflections</b>           | 6913 [R(int) = 0.0305]                                                                              |                           |
| <b>Max. and min. transmission</b>        | 0.7457 and 0.6002                                                                                   |                           |
| <b>Structure solution technique</b>      | direct methods                                                                                      |                           |
| <b>Structure solution program</b>        | SHELXS-97 (Sheldrick 2008)                                                                          |                           |
| <b>Refinement method</b>                 | Full-matrix least-squares on F <sup>2</sup>                                                         |                           |
| <b>Refinement program</b>                | SHELXL-2013 (Sheldrick, 2013)                                                                       |                           |
| <b>Function minimized</b>                | $\Sigma w(F_o^2 - F_c^2)^2$                                                                         |                           |
| <b>Data / restraints / parameters</b>    | 6913 / 2 / 388                                                                                      |                           |
| <b>Goodness-of-fit on F<sup>2</sup></b>  | 0.914                                                                                               |                           |
| <b><math>\Delta/\sigma_{\max}</math></b> | 0.001                                                                                               |                           |
| <b>Final R indices</b>                   | 6160 data;<br>I>2 $\sigma$ (I)                                                                      | R1 = 0.0397, wR2 = 0.0775 |
|                                          | all data                                                                                            | R1 = 0.0460, wR2 = 0.0803 |
| <b>Weighting scheme</b>                  | w=1/[ $\sigma^2(F_o^2)$ ]<br>where P=(F <sub>o</sub> <sup>2</sup> +2F <sub>c</sub> <sup>2</sup> )/3 |                           |
| <b>Absolute structure parameter</b>      | 0.0(0)                                                                                              |                           |
| <b>Largest diff. peak and hole</b>       | 0.706 and -0.291 eÅ <sup>-3</sup>                                                                   |                           |

|                                   |                        |
|-----------------------------------|------------------------|
| <b>R.M.S. deviation from mean</b> | 0.061 eÅ <sup>-3</sup> |
|-----------------------------------|------------------------|

**(2). Bond lengths (Å) for complex 4.**

|         |            |         |            |
|---------|------------|---------|------------|
| Mn1-C10 | 1.798(6)   | Mn1-C12 | 1.807(5)   |
| Mn1-C11 | 1.812(5)   | Mn1-P2  | 2.3446(14) |
| Mn1-P1  | 2.3536(14) | Mn1-Se1 | 2.5417(8)  |
| Se1-C1  | 1.933(5)   | P1-C7   | 1.828(5)   |
| P1-C1B  | 1.841(5)   | P1-C1A  | 1.843(5)   |
| P2-C1D  | 1.826(5)   | P2-C9   | 1.833(5)   |
| P2-C1C  | 1.846(5)   | O1-C10  | 1.137(6)   |
| O2-C11  | 1.137(6)   | O3-C12  | 1.138(6)   |
| C1-C6   | 1.374(8)   | C1-C2   | 1.378(8)   |
| C2-C3   | 1.374(8)   | C3-C4   | 1.367(11)  |
| C4-C5   | 1.366(11)  | C5-C6   | 1.382(9)   |
| C7-C8   | 1.516(8)   | C8-C9   | 1.533(8)   |
| C1A-C2A | 1.375(8)   | C1A-C6A | 1.384(7)   |
| C2A-C3A | 1.388(8)   | C3A-C4A | 1.361(9)   |
| C4A-C5A | 1.371(9)   | C5A-C6A | 1.381(8)   |
| C1B-C6B | 1.379(7)   | C1B-C2B | 1.392(7)   |
| C2B-C3B | 1.375(8)   | C3B-C4B | 1.370(9)   |
| C4B-C5B | 1.372(9)   | C5B-C6B | 1.382(7)   |
| C1C-C2C | 1.381(8)   | C1C-C6C | 1.387(8)   |
| C2C-C3C | 1.369(7)   | C3C-C4C | 1.381(10)  |
| C4C-C5C | 1.349(10)  | C5C-C6C | 1.376(8)   |
| C1D-C6D | 1.387(7)   | C1D-C2D | 1.389(7)   |
| C2D-C3D | 1.374(8)   | C3D-C4D | 1.373(9)   |
| C4D-C5D | 1.382(9)   | C5D-C6D | 1.384(8)   |

**(3). Bond angles (°) for complex 4.**

|             |            |             |            |
|-------------|------------|-------------|------------|
| C10-Mn1-C12 | 90.4(2)    | C10-Mn1-C11 | 90.3(2)    |
| C12-Mn1-C11 | 88.8(2)    | C10-Mn1-P2  | 92.72(16)  |
| C12-Mn1-P2  | 92.01(15)  | C11-Mn1-P2  | 176.84(15) |
| C10-Mn1-P1  | 99.79(16)  | C12-Mn1-P1  | 169.41(17) |
| C11-Mn1-P1  | 88.24(15)  | P2-Mn1-P1   | 90.37(5)   |
| C10-Mn1-Se1 | 172.31(16) | C12-Mn1-Se1 | 82.46(16)  |
| C11-Mn1-Se1 | 92.40(14)  | P2-Mn1-Se1  | 84.70(4)   |
| P1-Mn1-Se1  | 87.49(4)   | C1-Se1-Mn1  | 105.25(15) |
| C7-P1-C1B   | 103.9(2)   | C7-P1-C1A   | 103.1(2)   |
| C1B-P1-C1A  | 101.5(2)   | C7-P1-Mn1   | 113.50(18) |
| C1B-P1-Mn1  | 119.21(17) | C1A-P1-Mn1  | 113.69(15) |
| C1D-P2-C9   | 104.1(2)   | C1D-P2-C1C  | 99.9(2)    |
| C9-P2-C1C   | 101.9(2)   | C1D-P2-Mn1  | 115.23(16) |
| C9-P2-Mn1   | 115.47(17) | C1C-P2-Mn1  | 118.02(17) |

|             |          |             |          |
|-------------|----------|-------------|----------|
| C6-C1-C2    | 118.7(6) | C6-C1-Se1   | 119.3(5) |
| C2-C1-Se1   | 122.0(4) | C3-C2-C1    | 120.9(7) |
| C4-C3-C2    | 119.7(8) | C5-C4-C3    | 120.3(7) |
| C4-C5-C6    | 119.9(7) | C1-C6-C5    | 120.5(7) |
| C8-C7-P1    | 115.2(3) | C7-C8-C9    | 115.0(4) |
| C8-C9-P2    | 114.4(3) | O1-C10-Mn1  | 173.4(5) |
| O2-C11-Mn1  | 176.8(4) | O3-C12-Mn1  | 176.1(4) |
| C2A-C1A-C6A | 118.5(5) | C2A-C1A-P1  | 121.2(4) |
| C6A-C1A-P1  | 120.1(4) | C1A-C2A-C3A | 120.5(5) |
| C4A-C3A-C2A | 120.8(6) | C3A-C4A-C5A | 119.1(6) |
| C4A-C5A-C6A | 120.8(6) | C5A-C6A-C1A | 120.3(6) |
| C6B-C1B-C2B | 118.7(5) | C6B-C1B-P1  | 119.1(4) |
| C2B-C1B-P1  | 122.2(4) | C3B-C2B-C1B | 120.0(5) |
| C4B-C3B-C2B | 120.8(6) | C3B-C4B-C5B | 119.7(5) |
| C4B-C5B-C6B | 119.9(6) | C1B-C6B-C5B | 120.8(5) |
| C2C-C1C-C6C | 117.8(5) | C2C-C1C-P2  | 120.5(4) |
| C6C-C1C-P2  | 121.6(4) | C3C-C2C-C1C | 121.2(6) |
| C2C-C3C-C4C | 119.7(7) | C5C-C4C-C3C | 119.9(5) |
| C4C-C5C-C6C | 120.7(6) | C5C-C6C-C1C | 120.6(6) |
| C6D-C1D-C2D | 118.9(5) | C6D-C1D-P2  | 117.8(4) |
| C2D-C1D-P2  | 123.2(4) | C3D-C2D-C1D | 120.3(6) |
| C4D-C3D-C2D | 120.4(6) | C3D-C4D-C5D | 120.3(6) |
| C4D-C5D-C6D | 119.4(6) | C5D-C6D-C1D | 120.7(5) |

#### 4. Crystal structure information of complex 5.

##### (1). Data collection and structure refinement for complex 5.

|                                        |                                             |
|----------------------------------------|---------------------------------------------|
| <b>Theta range for data collection</b> | 1.75 to 27.50°                              |
| <b>Index ranges</b>                    | -11<=h<=12, -15<=k<=14, -17<=l<=17          |
| <b>Reflections collected</b>           | 10408                                       |
| <b>Independent reflections</b>         | 6675 [R(int) = 0.0315]                      |
| <b>Max. and min. transmission</b>      | 0.7456 and 0.6071                           |
| <b>Structure solution technique</b>    | direct methods                              |
| <b>Structure solution program</b>      | Bruker SHELXTL                              |
| <b>Refinement method</b>               | Full-matrix least-squares on F <sup>2</sup> |
| <b>Refinement program</b>              | SHELXL-2013 (Sheldrick, 2013)               |
| <b>Function minimized</b>              | $\Sigma w(F_o^2 - F_c^2)^2$                 |

|                                         |                                                                                                                                                               |                           |
|-----------------------------------------|---------------------------------------------------------------------------------------------------------------------------------------------------------------|---------------------------|
| <b>Data / restraints / parameters</b>   | 6675 / 0 / 388                                                                                                                                                |                           |
| <b>Goodness-of-fit on F<sup>2</sup></b> | 1.033                                                                                                                                                         |                           |
| <b>Final R indices</b>                  | 5615 data; I>2σ(I)                                                                                                                                            | R1 = 0.0483, wR2 = 0.1149 |
|                                         | all data                                                                                                                                                      | R1 = 0.0579, wR2 = 0.1206 |
| <b>Weighting scheme</b>                 | w=1/[σ <sup>2</sup> (F <sub>o</sub> <sup>2</sup> )+(0.0629P) <sup>2</sup> +0.2204P]<br>where P=(F <sub>o</sub> <sup>2</sup> +2F <sub>c</sub> <sup>2</sup> )/3 |                           |
| <b>Largest diff. peak and hole</b>      | 0.716 and -0.325 eÅ <sup>-3</sup>                                                                                                                             |                           |
| <b>R.M.S. deviation from mean</b>       | 0.086 eÅ <sup>-3</sup>                                                                                                                                        |                           |

**(2). Bond lengths (Å) for complex 5.**

|          |            |          |            |
|----------|------------|----------|------------|
| Mn1-C4   | 1.782(3)   | Mn1-C3   | 1.834(3)   |
| Mn1-C5   | 1.835(3)   | Mn1-O5   | 2.055(2)   |
| Mn1-P1   | 2.3449(12) | Mn1-P2   | 2.3661(13) |
| P1-C1B   | 1.827(3)   | P1-C1A   | 1.833(2)   |
| P1-C6    | 1.837(2)   | P2-C1C   | 1.818(2)   |
| P2-C8    | 1.832(2)   | P2-C1D   | 1.839(3)   |
| F1-C2    | 1.346(3)   | F2-C2    | 1.321(3)   |
| F3-C2    | 1.309(3)   | O1-C4    | 1.157(3)   |
| O2-C3    | 1.147(3)   | O3-C5    | 1.138(3)   |
| O4-C1    | 1.215(3)   | O5-C1    | 1.269(3)   |
| C1-C2    | 1.541(3)   | C6-C7    | 1.531(3)   |
| C6-H6A   | 0.99       | C6-H6B   | 0.99       |
| C7-C8    | 1.532(3)   | C7-H7A   | 0.99       |
| C7-H7B   | 0.99       | C8-H8A   | 0.99       |
| C8-H8B   | 0.99       | C1A-C2A  | 1.389(3)   |
| C1A-C6A  | 1.391(3)   | C2A-C3A  | 1.390(4)   |
| C2A-H2A  | 0.95       | C3A-C4A  | 1.389(4)   |
| C3A-H3A  | 0.95       | C4A-C5A  | 1.376(4)   |
| C4A-H4A  | 0.95       | C5A-C6A  | 1.387(4)   |
| C5A-H5A  | 0.95       | C6A-H6A1 | 0.95       |
| C1B-C6B  | 1.391(3)   | C1B-C2B  | 1.403(3)   |
| C2B-C3B  | 1.395(4)   | C2B-H2B  | 0.95       |
| C3B-C4B  | 1.376(4)   | C3B-H3B  | 0.95       |
| C4B-C5B  | 1.388(4)   | C4B-H4B  | 0.95       |
| C5B-C6B  | 1.387(3)   | C5B-H5B  | 0.95       |
| C6B-H6B1 | 0.95       | C1C-C2C  | 1.386(3)   |
| C1C-C6C  | 1.398(3)   | C2C-C3C  | 1.379(3)   |
| C2C-H2C  | 0.95       | C3C-C4C  | 1.392(4)   |

|         |          |         |          |
|---------|----------|---------|----------|
| C3C-H3C | 0.95     | C4C-C5C | 1.383(4) |
| C4C-H4C | 0.95     | C5C-C6C | 1.377(3) |
| C5C-H5C | 0.95     | C6C-H6C | 0.95     |
| C1D-C6D | 1.392(3) | C1D-C2D | 1.397(3) |
| C2D-C3D | 1.392(4) | C2D-H2D | 0.95     |
| C3D-C4D | 1.373(4) | C3D-H3D | 0.95     |
| C4D-C5D | 1.387(4) | C4D-H4D | 0.95     |
| C5D-C6D | 1.393(3) | C5D-H5D | 0.95     |
| C6D-H6D | 0.95     |         |          |

**(3). Bond angles (°) for complex 5.**

|             |            |            |            |
|-------------|------------|------------|------------|
| C4-Mn1-C3   | 87.58(10)  | C4-Mn1-C5  | 90.54(11)  |
| C3-Mn1-C5   | 90.52(11)  | C4-Mn1-O5  | 176.75(9)  |
| C3-Mn1-O5   | 92.59(9)   | C5-Mn1-O5  | 92.70(9)   |
| C4-Mn1-P1   | 94.53(9)   | C3-Mn1-P1  | 91.30(8)   |
| C5-Mn1-P1   | 174.68(7)  | O5-Mn1-P1  | 82.22(6)   |
| C4-Mn1-P2   | 95.72(8)   | C3-Mn1-P2  | 176.55(8)  |
| C5-Mn1-P2   | 88.45(8)   | O5-Mn1-P2  | 84.17(5)   |
| P1-Mn1-P2   | 89.44(5)   | C1B-P1-C1A | 100.23(12) |
| C1B-P1-C6   | 103.70(11) | C1A-P1-C6  | 100.86(11) |
| C1B-P1-Mn1  | 114.23(9)  | C1A-P1-Mn1 | 122.74(9)  |
| C6-P1-Mn1   | 112.59(9)  | C1C-P2-C8  | 105.58(12) |
| C1C-P2-C1D  | 102.43(11) | C8-P2-C1D  | 99.77(10)  |
| C1C-P2-Mn1  | 116.32(8)  | C8-P2-Mn1  | 115.10(8)  |
| C1D-P2-Mn1  | 115.56(8)  | C1-O5-Mn1  | 122.67(15) |
| O4-C1-O5    | 130.6(2)   | O4-C1-C2   | 118.7(2)   |
| O5-C1-C2    | 110.6(2)   | F3-C2-F2   | 108.2(2)   |
| F3-C2-F1    | 105.9(2)   | F2-C2-F1   | 106.0(2)   |
| F3-C2-C1    | 113.3(2)   | F2-C2-C1   | 112.6(2)   |
| F1-C2-C1    | 110.3(2)   | O2-C3-Mn1  | 176.0(2)   |
| O1-C4-Mn1   | 176.1(2)   | O3-C5-Mn1  | 176.8(2)   |
| C7-C6-P1    | 112.18(16) | C7-C6-H6A  | 109.2      |
| P1-C6-H6A   | 109.2      | C7-C6-H6B  | 109.2      |
| P1-C6-H6B   | 109.2      | H6A-C6-H6B | 107.9      |
| C6-C7-C8    | 113.81(19) | C6-C7-H7A  | 108.8      |
| C8-C7-H7A   | 108.8      | C6-C7-H7B  | 108.8      |
| C8-C7-H7B   | 108.8      | H7A-C7-H7B | 107.7      |
| C7-C8-P2    | 116.21(15) | C7-C8-H8A  | 108.2      |
| P2-C8-H8A   | 108.2      | C7-C8-H8B  | 108.2      |
| P2-C8-H8B   | 108.2      | H8A-C8-H8B | 107.4      |
| C2A-C1A-C6A | 118.9(2)   | C2A-C1A-P1 | 122.07(19) |

|              |            |              |            |
|--------------|------------|--------------|------------|
| C6A-C1A-P1   | 118.95(19) | C1A-C2A-C3A  | 119.9(2)   |
| C1A-C2A-H2A  | 120.1      | C3A-C2A-H2A  | 120.1      |
| C4A-C3A-C2A  | 120.5(3)   | C4A-C3A-H3A  | 119.8      |
| C2A-C3A-H3A  | 119.8      | C5A-C4A-C3A  | 119.8(2)   |
| C5A-C4A-H4A  | 120.1      | C3A-C4A-H4A  | 120.1      |
| C4A-C5A-C6A  | 119.8(3)   | C4A-C5A-H5A  | 120.1      |
| C6A-C5A-H5A  | 120.1      | C5A-C6A-C1A  | 121.0(3)   |
| C5A-C6A-H6A1 | 119.5      | C1A-C6A-H6A1 | 119.5      |
| C6B-C1B-C2B  | 118.9(2)   | C6B-C1B-P1   | 121.95(18) |
| C2B-C1B-P1   | 119.18(19) | C3B-C2B-C1B  | 120.1(3)   |
| C3B-C2B-H2B  | 119.9      | C1B-C2B-H2B  | 119.9      |
| C4B-C3B-C2B  | 120.2(3)   | C4B-C3B-H3B  | 119.9      |
| C2B-C3B-H3B  | 119.9      | C3B-C4B-C5B  | 120.0(3)   |
| C3B-C4B-H4B  | 120.0      | C5B-C4B-H4B  | 120.0      |
| C6B-C5B-C4B  | 120.2(3)   | C6B-C5B-H5B  | 119.9      |
| C4B-C5B-H5B  | 119.9      | C5B-C6B-C1B  | 120.5(2)   |
| C5B-C6B-H6B1 | 119.7      | C1B-C6B-H6B1 | 119.7      |
| C2C-C1C-C6C  | 119.0(2)   | C2C-C1C-P2   | 123.32(18) |
| C6C-C1C-P2   | 117.64(18) | C3C-C2C-C1C  | 120.3(2)   |
| C3C-C2C-H2C  | 119.9      | C1C-C2C-H2C  | 119.9      |
| C2C-C3C-C4C  | 120.5(2)   | C2C-C3C-H3C  | 119.8      |
| C4C-C3C-H3C  | 119.8      | C5C-C4C-C3C  | 119.4(2)   |
| C5C-C4C-H4C  | 120.3      | C3C-C4C-H4C  | 120.3      |
| C6C-C5C-C4C  | 120.2(2)   | C6C-C5C-H5C  | 119.9      |
| C4C-C5C-H5C  | 119.9      | C5C-C6C-C1C  | 120.6(2)   |
| C5C-C6C-H6C  | 119.7      | C1C-C6C-H6C  | 119.7      |
| C6D-C1D-C2D  | 118.4(2)   | C6D-C1D-P2   | 118.77(18) |
| C2D-C1D-P2   | 122.83(18) | C3D-C2D-C1D  | 120.1(2)   |
| C3D-C2D-H2D  | 119.9      | C1D-C2D-H2D  | 119.9      |
| C4D-C3D-C2D  | 121.2(2)   | C4D-C3D-H3D  | 119.4      |
| C2D-C3D-H3D  | 119.4      | C3D-C4D-C5D  | 119.3(2)   |
| C3D-C4D-H4D  | 120.3      | C5D-C4D-H4D  | 120.3      |
| C4D-C5D-C6D  | 120.1(2)   | C4D-C5D-H5D  | 119.9      |
| C6D-C5D-H5D  | 119.9      | C1D-C6D-C5D  | 120.9(2)   |
| C1D-C6D-H6D  | 119.5      | C5D-C6D-H6D  | 119.5      |
